# Supplementary material for: Representation of patients with a migration background in studies on antithrombotic treatment. An analysis of recruitment data from a cluster randomized controlled trial
Source: PLOS journal article supplement (doi:10.1371/journal.pone.0230297), 2020-03-16
Supplement: S1 (10.1371/journal.pone.0230297.s001) [file journal.pone.0230297.s001.pdf]

## Screening sheet

1. Gender of patient:  Female  Male

2. Patient's month and year of birth:      
M M J J

3. Which of the following indications for an oral anticoagulant are present in the patient?

*(Multiple answers possible; please give family doctor response card 1)*

**Chronic atrial fibrillation/flutter** (paroxysmal, persistent or permanent)

*If so, please also provide CHA<sub>2</sub>DS<sub>2</sub>VASc score: (give family doctor response card 2)*

CHA<sub>2</sub>DS<sub>2</sub>-VASc score > 1

CHA<sub>2</sub>DS<sub>2</sub>-VASc score = 1

CHA<sub>2</sub>DS<sub>2</sub>-VASc score = 0

**Deep vein thrombosis (DVT)**

*If so, please specify:*

High risk of recurrence: repeated episodes of, or current severe thrombophilia

Low risk of recurrence: first episode provoked by transient (reversible) risk factor or primary idiopathic thrombosis

**Left atrial enlargement (LAE)**

*If so, please specify:*

High risk of recurrence: repeated episodes of, or current severe thrombophilia

Low risk of recurrence: first episode provoked by transient (reversible) risk factor or primary idiopathic thrombosis

**Mechanical heart valve**

**Intracardiac thrombi**

**Other indication, namely:** \_\_\_\_\_

**4. What permanent anticoagulant drug(s) is the patient taking?** (please give family doctor response card 3)

- |                                                                   |                                                               |
|-------------------------------------------------------------------|---------------------------------------------------------------|
| <input type="checkbox"/> phenprocoumon (e.g. Marcumar®)           | <input type="checkbox"/> dabigatran (Pradaxa®)                |
| <input type="checkbox"/> rivaroxaban (Xarelto®)                   | <input type="checkbox"/> acetylsalicylic acid (e.g. Aspirin®) |
| <input type="checkbox"/> another blood-thinning medication: _____ |                                                               |
| <input type="checkbox"/> no medication because: _____             |                                                               |

**5. Which study group will the patient be allocated to?** Please use the "flowchart to determine list of patients" and allocate patient to only one group!

|                                                                                                                                                                                  |                          |                                                                    |
|----------------------------------------------------------------------------------------------------------------------------------------------------------------------------------|--------------------------|--------------------------------------------------------------------|
| <b>Group 1:</b> A long-term oral anticoagulant (OAC) is indicated <u>and</u> patient is taking one                                                                               | <input type="checkbox"/> | → continue to question 6                                           |
| <b>Group 2:</b> A long-term OAC is indicated but patient is not taking one                                                                                                       | <input type="checkbox"/> | → continue to question 6                                           |
| <b>Group 3:</b> A long-term anticoagulant is <u>not</u> indicated, but patient is currently taking one                                                                           | <input type="checkbox"/> | → Enter into "Group 3 list of patients" and continue to question 7 |
| <b>Other reasons</b> (e.g. patient is receiving a one-off OAC therapy because episode occurred 3-6 months previously, or is receiving an anticoagulant due to an arterial event) | <input type="checkbox"/> | → Questionnaire ends here                                          |

**6. Do any of the following exclusion criteria apply to the patient?** (Multiple answers possible; give family doctor response card 4; If the patient is to participate in the intervention, the doctor should assess whether regular contact with the HCA will be possible)

- Dementia that in the doctor's opinion would prevent participation in the study
- Final stage of the disease (estimated life expectancy < 6 months)
- Psychosis
- Severe visual or auditory impairment that in the doctor's opinion would prevent participation in the study
- Alcohol or drug abuse that in the doctor's opinion would prevent participation in the study
- Accommodation in a facility (e.g. nursing or old people's home) that in the doctor's opinion would prevent participation in the study
- Inadequate command of the German language
- Other exclusion criterion, namely: \_\_\_\_\_

There are **no** reasons for exclusion → please enter patient into the list and allocate him or her a new consecutive ID:

Allocated patient ID:   -P

**7. What is the patient's therapeutic INR target range?**

INR   .   to   .

**8. Most recent INR value:**

.

**Date of measurement:**

20    
M M J J

**9. Does the patient measure INR value and adjust the dose independently?**

- No
- Yes, measures INR and adjusts dose independently
- Yes, measures the INR value but does not adjust the dose independently

If the patient performs self-management:

9.1 On whose initiative did the patient undergo self-management training?

---

9.2 Which training center did the patient go to?

---

**10. How compliant is the patient in the doctor's opinion?**

- very compliant     moderately compliant     not compliant

Any other comments/ remarks: \_\_\_\_\_

**11. Does the patient have a migrant background?**

*A migrant background is considered to exist if the patient does not have German citizenship, and/or was not born in Germany, and/or one or both of the patient's parents were born outside Germany.*

- Yes → ***continue with question 12***
- No → ***Questionnaire ends here***

**12. Patient's country of birth:**

- Germany
- Another country of birth: \_\_\_\_\_
- Country of birth is unknown

**13. Patient's native language:**

- German
- Another language: \_\_\_\_\_
- Native language is unknown

**14. How would you assess the patient's command of the German language?**

- 1  =very good                      2  =good                      3  =satisfactory
- 4  =adequate                      5  =poor                      6  =inadequate
